# Supplementary material
Source: publisher figshare collection journal article supplement (https://tandf.figshare.com/ndownloader/files/17921915)
Supplement: Supplementary file 1 [file 17921915]

|  |  |  |  |  |  |
| --- | --- | --- | --- | --- | --- |
|  |  |  |  |  |  |
|  |  |  |  |  |  |
| **Supplementary Table 1. Classification of diseases within the nervous system and sensory organs in 11 main diagnostic groups and 56 more specific sub-categories included in the present analyses according to the disease codes of the International Classification of Diseases, 7th-10th revision (ICD-7-ICD-10).** | | | | | |
| Main diagnostic group | ICD-7 | ICD-8 (INT) | ICD-8 (DEN) | ICD-9 | ICD-10 |
| Sub-categories of neurologic disorders |  |  |  |  |  |
| *1. Inflammatory and infectious diseases of the central nervous system* | 340-344, 057.0 | 320-324, 036.0 | 320-324, 036.0 | 320-326, 036 | G00-G09, A39 |
| 1. Meningitis | 340, 057.0 | 320, 036.0 | 320, 036.0 | 320-322, 036 | G00-G03, A39 |
| 2. Encephalitis, myelitis and encephalomyetis | 343 | 323 | 323 | 323 | G04-G05 |
| 3. Intracranial and intraspinal abscess and granuloma | 342 | 322 | 322 | 324 | G06-G07 |
| 4. Intracranial and intraspinal phlebitis and thrombophlebitis | 341 | 321 | 321 | 325 | G08 |
| 5. Sequelae of inflammatory diseases of the central nervous system | 344 | 324 | 324 | 326 | G09 |
| *2. Systemic atrophies primarily affecting the central nervous system* |  |  |  |  | G13.1 |
| 6. Other systemic atrophy primarily affecting central nervous system in neoplastic disease |  |  |  |  | G13.1 |
|  |  |  |  |  |  |
| *3. Extrapyramidal and movement disorders* | 350 | 342 | 342 | 332, 333.0-333.3 | G20-G24.0 |
|  |  | 306.2 | 306.2 | 333.5-333.99 | G24.2-G26 |
| 7. Parkinson disease and secondary parkinsonism | 350 | 342 | 342 | 332.0, 332.1, 333.92 | G20-G22 |
| 8. Dystonia and dyskinesia |  |  |  | 333.6-333.89 | G24.0, G24.2-G24.9 |
| 9. Tremor, myoclonus, chorea and tics |  | 306.2 (tics) | 306.2 (tics) | 333.1-333.3, 333.5, | G25 |
|  |  |  |  | 333.90, 333.91, |  |
|  |  |  |  | 333.93, 333.99 |  |
| *4. Degenerative diseases of the nervous system* |  | 290 | 290 | 290 | F00-F03, F26 |
|  |  |  |  | 331.0-331.2, 331.7 | G30-G32 |
|  |  |  |  | 331.8, 331.89, 331.9 |  |
| 10. Dementia and Alzheimer disease |  | 290 | 290.09, 290.19 | 290, 331.0 | F00-F03, G30 |
| 11. Other degenerative diseases of nervous system |  |  |  | 330.8, 331.1, 331.8, | G31 |
|  |  |  |  | 331.9 |  |
| *5. Demyelinating diseases of the central nervous system* | 345 | 340, 341 | 340, 341 | 340, 341 | G35-G37 |
| 12. Multiple sclerosis and other acute disseminated demyelination | 345 | 340 | 340, 341.00 | 340, 341.0 | G35, G36 |
| 13. Other demyelinating diseases of central nervous system |  | 341 | 341.01, 341.09 | 341.1, 341.8, 341.9 | G37 |
| *6. Episodic and paroxysmal disorders* | 353, 354, 791, 780.7 | 345, 346, 791, 347.0, | 345, 346, 791, | 345, 346, 784.0, | G40, G41, G43, G44, |
|  |  | 780.6 | 347.09, 780.6 | 347, 780.5 | G47 |
| 14. Epilepsy | 353 | 345 | 345 | 345 | G40, G41 |
| 15. Migraine and headache | 354, 791 | 346, 791 | 346, 791 | 346, 784.0 | G43, G44 |
| 16. Sleep disturbances, including narcolepsy and cataplexy | 780.7 | 347.0, 780.6 | 347.09, 780.6 | 347, 780.5 | G47 |
| *7. Nerve, nerve root and plexus disorders* | 360, 361, 366, | 350, 351, 356, 357 | 350, 351, 356, 357 | 350-355 | G50-G59 |
|  | 367, 368 |  |  |  |  |
| 17. Disorders of cranial nerves | 360, 361 | 350-351, 356 | 350-351, 356 | 350-352 | G50-G53 |
| 18. Nerve root and plexus disorders |  |  |  | 353 | G54, G55 |
| 19. Cervical, brachial, thoracic, |  |  |  | 353.0, 353.2, 353.3 | G54.0, G54.2, G54.3 |
| 20. Lumbosacral |  |  |  | 353.1, 353.4 | G54.1, G54.4 |
| 21. Phantom limb syndrome |  |  |  | 353.6 | G54.6, G54.7 |
| 22. Mononeuropathies |  |  |  | 354-355 | G56-G59 |
| *8. Neuropathy, polyneuropathies and other disorders of the peripheral nervous system* | 364, 365 | 354 | 354 | 357 | G61-G64 |
| 23. Neuropathy and polyneuropathy | 364 | 354 | 354 | 357 | G61-G63 |
| 24. Guillain-Barré syndrome |  |  |  | 357.0 | G61.0 |
| 25. Drug-induced neuropathy |  |  |  | 357.6 | G62.0 |
| 26. Polyneuropathy due to other toxic agents (excluding alcohol) |  |  |  | 357.7 | G62.2 |
| 27. Radiation-induced polyneuropathy |  |  |  |  | G62.8 |
| 28. Polyneuropathy in neoplastic disease |  |  |  |  | G63.1 |
| *9. Paralytic syndromes* | 352 | 344 | 344 | 342, 344 | G81-G83 |
| 29. Hemiplegia |  | 344.1 | 344.1 | 342 | G81 |
| 30. Paraplegia and tetraplegia |  | 344.2, 344.3 | 344.2, 344.3 | 344.0-344.1 | G82 |
| 31. Monoplegia |  | 344.0 | 344.0 | 344.3, 344.4, 344.5 | G83.1, G83.2, G83.3 |
| 32. Other paralytic syndromes |  | 344.9 | 344.9 | 344.2, 344.6, 344.8, 344.9 | G83.0, G83.4, G83.8, G83.9 |
| *10.*  *Hydrocephalus, Horner’s syndrome and other disorders of the nervous system* | 355, 357, 369, 781.8 | 347.9, 349, 358, 781.7 | 347.93-347.99, 349, 358.00, 358.08, 358.09, 781.7 | 331.3, 331.4, 331.7, 331.81, 336, 337.0, 337.1, 337.9, 348, 349, 388.61 | G90, G91-G99 |
| 33. Hydrocephalus |  | 347.93 | 347.93-347.95 | 331.3, 331.4 | G91, G94.0-G94.2 |
| 34. Encephalopathy | 781.8 | 781.7 | 781.7 | 348.3, 349.82 | G92, G93.4 |
| 35. Toxic encephalopathy |  |  |  | 349.82 | G92 |
| 36. Horner’s syndrome |  | 358.0 | 358.00 |  | G90.2 |
| 37. Cerebral cysts |  |  |  | 348.0 | G93.0 |
| 38. Anoxic brain damage, not elsewhere classified |  |  |  | 348.1 | G93.1 |
| 39. Benign intracranial hypertension |  |  |  | 348.2 | G93.2 |
| 40. Compression of brain |  |  |  | 348.4 | G93.5 |
| 41. Cerebral oedema |  |  |  | 348.5 | G93.6 |
| 42. Reye's syndrome |  |  |  | 331.81 | G93.7 |
| 43. Other specified disorders of brain, postradiation encephalopathy |  |  |  | 348.8 | G93.8 |
| 44. Disorder of brain, unspecified |  |  |  | 348.9 | G93.9 |
| 45. Syringomyelia and syringobulbia |  | 349.0 | 349.0 | 336.0 | G95.0 |
| 46. Vascular myelopathies |  |  |  | 336.1 | G95.1 |
| 47. Cord compression, unspecified |  |  |  |  | G95.2 |
| 48. Other specified diseases of spinal cord (cord bladder NOS, myelopathy (drug- or radiation induced) |  |  |  |  | G95.8 |
| 49. Cerebrospinal fluid leak |  |  |  | 349.81, 388.61 | G96.0 |
| 50. Disorders of meninges, not elsewhere classified |  |  |  | 349.2 | G96.1 |
| 51. Post procedural disorders of nervous system |  |  |  | 349.0, 349.1, 997.0 | G97 |
| *11. Diseases within sensory organs* |  |  |  |  |  |
| 52. Inflammatory and other diseases of the eye | 370–384, 386–389 | 360–373, 375–379 | 360–373, 375–379 | 360–365, 367–379 | H00–H22, H30–H36, H43–H59 |
| 53. Cataract | 385 | 374 | 374 | 366 | H25–H28, H40–H42 |
| 54. Inflammatory diseases of the ear | 390–394 | 380–384 | 380–384 | 380–384 | H60–H75 |
| 55. Ménière's disease and otosclerosis | 395 | 385–386 | 385–386 | 386–387 | H80–H82 |
| 56. Hearing loss, deafness and other diseases of the ear | 396–398 | 387–389 | 387–389 | 385, 388–389 | H83–H95 |
